# Supplementary material
Source: publisher site journal article supplement (https://www.dovepress.com/article/282350)
Supplement: Supplementary file 1 [file get_supplementary_file.php]

**Table S1.** Primers for qRT-PCR.

| Primer | Primer sequence |
| --- | --- |
| BC037916 | F: 5’-ACG CTA TTC TAA GGA CCA TAC-3’  R: 5’- TTT CTC CTA CTC ACC TCA AAC-3’ |
| Twist | F: 5'-GTC GCT CTG GAG GAC CTG GTA G-3'  R: 5'-GCA AGA AGT CTG CGG GCT GTG- 3' |
| GAPDH | F: 5’- CAC CCA CTC CTC CAC CTT TG-3’  R: 5’- CCA CCA CCC TGT TGC TGT AG-3’ |
| miR-3145-3p | RT-Primer：5'-GTC GTA TCC AGT GCA GGG TCC GAG GTA TTC GCA CTG GAT ACG ACC AAT TC-3'  F: 5'-CGC GAG ATA TTT TGA GTG TTT G-3'  R: 5'-AGT GCA GGG TCC GAG GTA TT-3' |
| miR-4482-3p | RT-Primer：5'- GTC GTA TCC AGT GCA GGG TCC GAG GTA TTC GCA CTG GAT ACG ACG AGC CC -3'  F: 5'- GCG CGT TTC TAT TTC TCA GTG -3'  R: 5'- AGT GCA GGG TCC GAG GTA TT -3 |
| miR-12136 | RT-Primer：5'- GTC GTA TCC AGT GCA GGG TCC GAG GTA TTC GCA CTG GAT ACG ACG GCC TC -3'  F: 5'- CGC GCG GAA AAA GTC ATG -3'  R: 5'- AGT GCA GGG TCC GAG GTA TT -3 |
| RNU6-1 | F: 5'-CTC GCT TCG GCA GCA CA -3'  R: 5'-AAC GCT TCA CGA ATT TGC GT -3' |


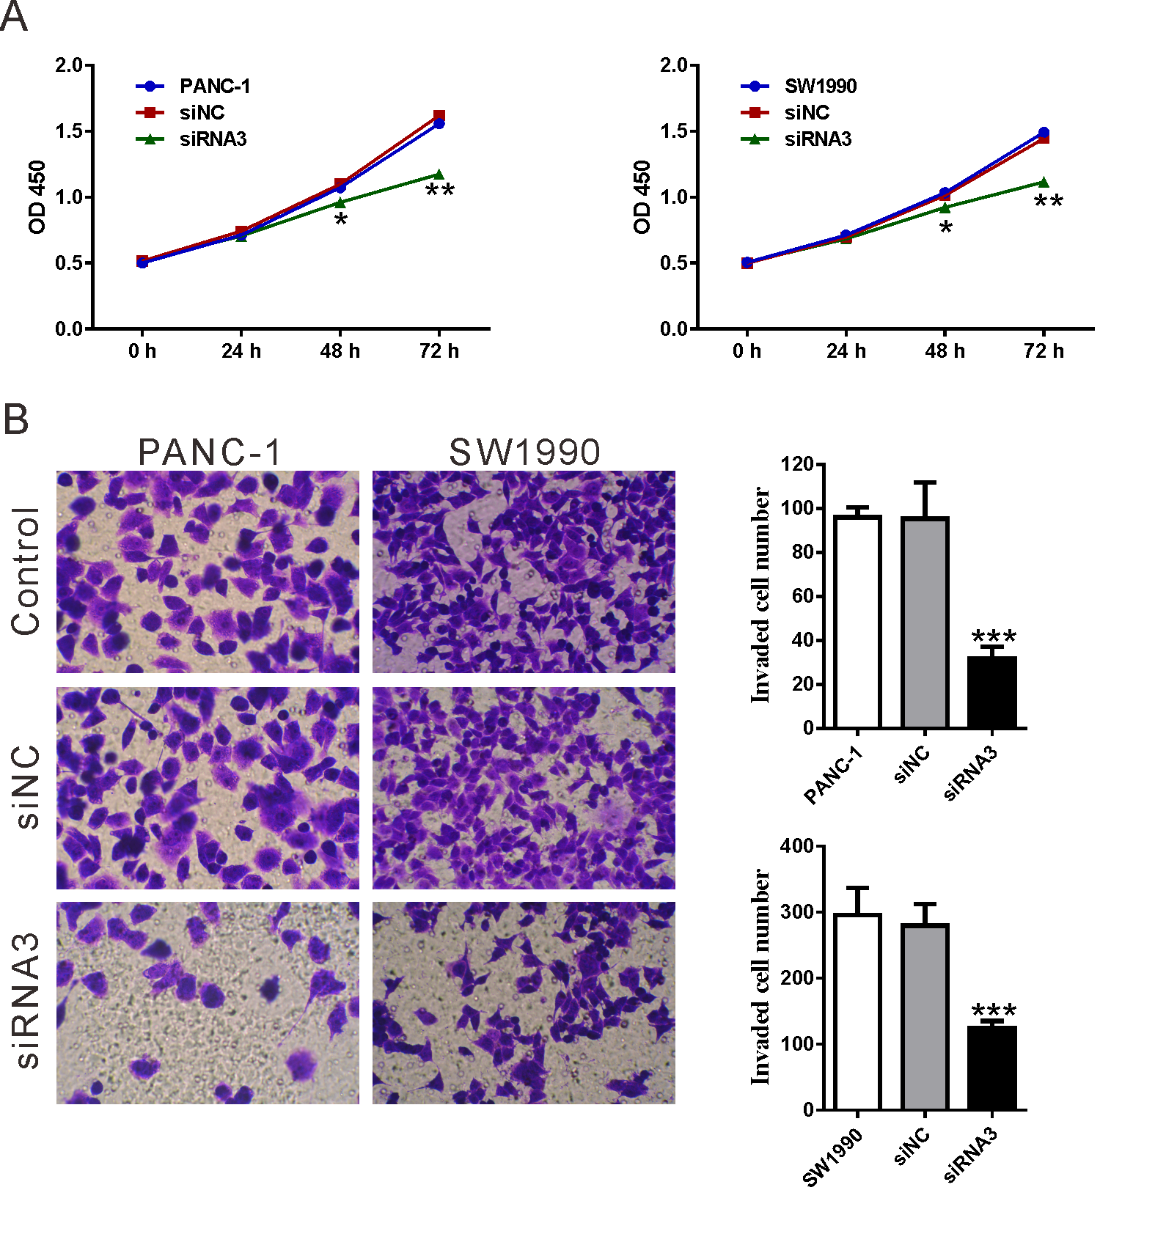


**Figure S1.** siRNA targeting BC037916 (siRNA3) inhibited pancreatic cancer cell proliferation and invasion. PANC-1 and SW1990 cells were transfected with control siRNA (siNC) or a siRNA targeting BC037916 (siRNA3). (A) For evaluating cell proliferation, viable cell numbers at various time points after transfection were evaluated by CCK-8 assay. (B) Cell invasion was determined by Transwell assay. Magnification: 200×. **P*<0.05, ***P*<0.01 and ****P*<0.001 vs siNC.


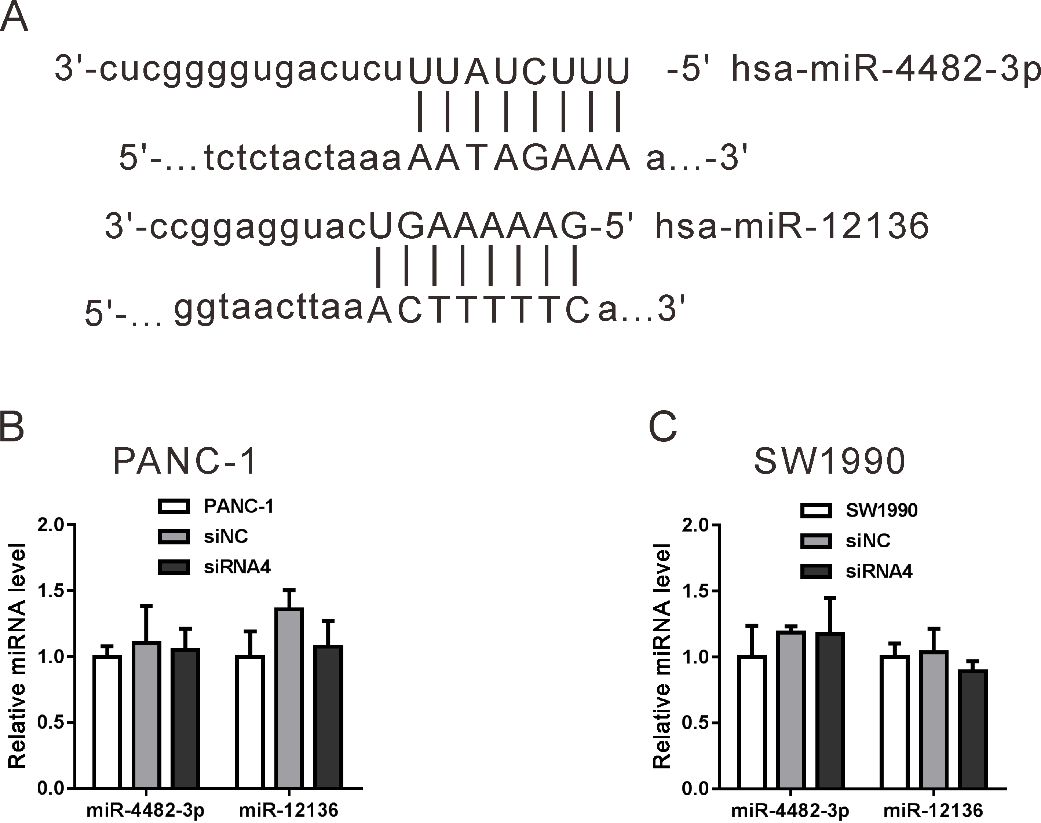


**Figure S2.** (A)Putative binding sites of BC037916 with miR-4482-3p and miR-12136, as predicted by FINDTAR3. (B, C) BC037916 knockdown had little effect on miR-4482-3p and miR-12136 expression in PANC-1 (B) and SW1990 (C) cells.
